# Supplementary material for: PanEcho: Complete AI-enabled echocardiography interpretation with multi-task deep learning
Source: bioRxiv or medRxiv preprint supplement (doi:10.1101/2024.11.16.24317431), 2025-04-16
Supplement: Supplementary file [file media-1.pdf]

**Extended Data Table 1 | Internal cohort description**

|                                                             |                            | <b>Total</b>  | <b>Training</b> | <b>Validation</b> | <b>Test</b>   |
|-------------------------------------------------------------|----------------------------|---------------|-----------------|-------------------|---------------|
| <b>Patients, <i>n</i></b>                                   |                            | 26,067        | 19,868          | 1,611             | 4,588         |
| <b>Studies, <i>n</i></b>                                    |                            | 33,927        | 26,655          | 2,142             | 5,130         |
| <b>Videos, <i>n</i></b>                                     |                            | 1,230,490     | 1,033,146       | 83,064            | 114,280       |
| <b>Age (years), <i>mean (sd)</i></b>                        |                            | 67.1 (16.0)   | 67.5 (15.9)     | 67.2 (15.4)       | 65.4 (16.7)   |
| <b>Sex, <i>n (%)</i></b>                                    | <i>Male</i>                | 16,826 (52.2) | 13,201 (52.5)   | 1,047 (52.3)      | 2,578 (50.4)  |
|                                                             | <i>Female</i>              | 15,438 (47.8) | 11,949 (47.5)   | 955 (47.7)        | 2,534 (49.6)  |
| <b>Race, <i>n (%)</i></b>                                   | <i>White</i>               | 24,603 (79.7) | 19,204 (79.6)   | 1,533 (80.3)      | 3,866 (80.1)  |
|                                                             | <i>Black</i>               | 4,384 (14.2)  | 3,453 (14.3)    | 253 (13.3)        | 678 (14.0)    |
|                                                             | <i>Asian</i>               | 541 (1.8)     | 399 (1.7)       | 33 (1.7)          | 109 (2.3)     |
|                                                             | <i>Other</i>               | 1,330 (4.3)   | 1065 (4.4)      | 89 (4.7)          | 176 (3.6)     |
| <b>Aortic Root Dimension (cm),<br/><i>mean (sd)</i></b>     |                            | 3.33 (0.47)   | 3.32 (0.47)     | 3.32 (0.48)       | 3.35 (0.48)   |
| <b>AV Peak Velocity (m/s),<br/><i>mean (sd)</i></b>         |                            | 1.83 (0.89)   | 1.87 (0.92)     | 1.82 (0.89)       | 1.65 (0.67)   |
| <b>AV Regurgitation, <i>n (%)</i></b>                       | <i>None-Trace</i>          | 22,014 (75.9) | 16975 (75.5)    | 1363 (75.3)       | 3676 (77.9)   |
|                                                             | <i>Mild</i>                | 5,082 (17.5)  | 3980 (17.7)     | 329 (18.2)        | 773 (16.4)    |
|                                                             | <i>Moderate or greater</i> | 1,917 (6.6)   | 1526 (6.8)      | 119 (6.6)         | 272 (5.8)     |
| <b>AV Stenosis, <i>n (%)</i></b>                            | <i>None</i>                | 22,754 (81.3) | 17118 (79.5)    | 1422 (81.8)       | 4214 (89.6)   |
|                                                             | <i>Mild-Moderate</i>       | 3,209 (11.5)  | 2616 (12.1)     | 192 (11.0)        | 401 (8.5)     |
|                                                             | <i>Severe</i>              | 2,020 (7.2)   | 1809 (8.4)      | 125 (7.2)         | 86 (1.8)      |
| <b>AV Structure, <i>n (%)</i></b>                           | <i>Bicuspid</i>            | 264 (1.0)     | 207 (1.0)       | 5 (0.3)           | 52 (1.1)      |
| <b>E e' Ratio, <i>mean (sd)</i></b>                         |                            | 11.42 (5.05)  | 11.70 (5.17)    | 11.38 (5.04)      | 10.19 (4.31)  |
| <b>Ejection Fraction (%),<br/><i>mean (sd)</i></b>          |                            | 58.98 (11.72) | 58.95 (11.95)   | 59.23 (11.63)     | 59.03 (10.62) |
| <b>Global Longitudinal Strain (%),<br/><i>mean (sd)</i></b> |                            | -17.26 (4.15) | -16.79 (4.30)   | -16.73 (4.06)     | -18.91 (3.15) |
| <b>Increased LA Size, <i>n (%)</i></b>                      | <i>None</i>                | 20,373 (63.1) | 15595 (62.1)    | 1251 (62.4)       | 3527 (68.8)   |
|                                                             | <i>Mild</i>                | 5,702 (17.7)  | 4543 (18.1)     | 354 (17.7)        | 805 (15.7)    |
|                                                             | <i>Moderate or greater</i> | 6,190 (19.2)  | 4992 (19.9)     | 400 (20.0)        | 798 (15.6)    |
| <b>Increased LV Size, <i>n (%)</i></b>                      | <i>None</i>                | 21,238 (86.3) | 16249 (86.2)    | 1329 (88.4)       | 3660 (85.8)   |
|                                                             | <i>Mild</i>                | 1,827 (7.4)   | 1396 (7.4)      | 93 (6.2)          | 338 (7.9)     |
|                                                             | <i>Moderate or greater</i> | 1,553 (6.3)   | 1201 (6.4)      | 82 (5.5)          | 270 (6.3)     |
| <b>Increased LV Wall Thickness,</b>                         | <i>Any</i>                 | 15,470 (52.4) | 12509 (54.8)    | 990 (54.0)        | 1971 (40.2)   |

|                                                                |                            |                |                |                |                |
|----------------------------------------------------------------|----------------------------|----------------|----------------|----------------|----------------|
| <i>n (%)</i>                                                   | <i>Moderate or greater</i> | 3,575 (12.7)   | 3021 (13.9)    | 239 (13.7)     | 315 (6.5)      |
| <b>Increased RA Size, <i>n (%)</i></b>                         | <i>Any</i>                 | 3,726 (29.7)   | 2988 (29.8)    | 231 (28.2)     | 507 (29.3)     |
| <b>Increased RV Size, <i>n (%)</i></b>                         | <i>None</i>                | 24,868 (84.2)  | 19229 (83.8)   | 1551 (85.3)    | 4088 (85.9)    |
|                                                                | <i>Mild</i>                | 2,940 (10.0)   | 2313 (10.1)    | 170 (9.3)      | 457 (9.6)      |
|                                                                | <i>Moderate or greater</i> | 1,730 (5.9)    | 1417 (6.2)     | 98 (5.4)       | 215 (4.5)      |
| <b>IVSd (cm), <i>mean (sd)</i></b>                             |                            | 1.11 (0.30)    | 1.12 (0.30)    | 1.13 (0.34)    | 1.02 (0.25)    |
| <b>LA Volume (cm<sup>3</sup>),<br/><i>mean (sd)</i></b>        |                            | 59.41 (19.25)  | 59.87 (19.37)  | 59.73 (19.22)  | 57.29 (18.58)  |
| <b>LAIDs (cm), <i>mean (sd)</i></b>                            |                            | 4.05 (0.82)    | 4.06 (0.82)    | 4.01 (0.81)    | 4.02 (0.81)    |
| <b>LV Diastolic Dysfunction,<br/><i>n (%)</i></b>              | <i>None</i>                | 11,809 (50.9)  | 8583 (48.4)    | 702 (50.1)     | 2524 (62.0)    |
|                                                                | <i>Mild</i>                | 8,086 (34.9)   | 6376 (36.0)    | 496 (35.4)     | 1214 (29.8)    |
|                                                                | <i>Moderate or greater</i> | 3,298 (14.2)   | 2762 (15.6)    | 203 (14.5)     | 333 (8.2)      |
| <b>LV ED Volume (cm<sup>3</sup>),<br/><i>mean (sd)</i></b>     |                            | 107.07 (47.76) | 106.07 (47.86) | 104.96 (46.06) | 113.51 (47.45) |
| <b>LV ES Volume (cm<sup>3</sup>),<br/><i>mean (sd)</i></b>     |                            | 45.77 (33.25)  | 45.42 (33.39)  | 44.22 (32.06)  | 48.42 (32.85)  |
| <b>LV Stroke Volume (cm<sup>3</sup>),<br/><i>mean (sd)</i></b> |                            | 61.21 (23.55)  | 60.53 (23.54)  | 60.69 (23.23)  | 65.21 (23.34)  |
| <b>LV Systolic Dysfunction,<br/><i>n (%)</i></b>               | <i>None-Hyperdynamic</i>   | 25,702 (85.1)  | 19820 (84.5)   | 1607 (85.9)    | 4275 (87.6)    |
|                                                                | <i>Mild</i>                | 2,225 (7.4)    | 1782 (7.6)     | 124 (6.6)      | 319 (6.5)      |
|                                                                | <i>Moderate or greater</i> | 2,273 (7.5)    | 1849 (7.9)     | 140 (7.5)      | 284 (5.8)      |
| <b>LV Wall Motion Abnormalities,<br/><i>n (%)</i></b>          |                            | 2195 (20.9)    | 1704 (20.6)    | 143 (21.4)     | 348 (22.6)     |
| <b>LVIDd (cm), <i>mean (sd)</i></b>                            |                            | 4.58 (0.72)    | 4.58 (0.73)    | 4.55 (0.73)    | 4.64 (0.69)    |
| <b>LVIDs (cm), <i>mean (sd)</i></b>                            |                            | 3.07 (0.75)    | 3.07 (0.76)    | 3.04 (0.76)    | 3.08 (0.70)    |
| <b>LVOT Diameter (cm), <i>mean (sd)</i></b>                    |                            | 2.04 (0.21)    | 2.04 (0.21)    | 2.05 (0.22)    | 2.05 (0.21)    |
| <b>Elevated LVOT PG, <i>n (%)</i></b>                          | <i>≥20 mmHg</i>            | 298 (1.1)      | 249 (1.2)      | 25 (1.5)       | 24 (0.6)       |
| <b>LVPWd (cm), <i>mean (sd)</i></b>                            |                            | 1.05 (0.22)    | 1.06 (0.22)    | 1.06 (0.22)    | 1.00 (0.20)    |
| <b>MV Regurgitation, <i>n (%)</i></b>                          | <i>None-Trace</i>          | 16013 (52.3)   | 12041 (50.7)   | 996 (52.3)     | 2976 (59.4)    |
|                                                                | <i>Mild</i>                | 10013 (32.7)   | 7968 (33.6)    | 626 (32.9)     | 1419 (28.3)    |
|                                                                | <i>Moderate or greater</i> | 4612 (15.1)    | 3718 (15.7)    | 282 (14.8)     | 612 (12.2)     |
| <b>MV Stenosis, <i>n (%)</i></b>                               | <i>Any</i>                 | 901 (3.8)      | 758 (4.1)      | 54 (3.7)       | 89 (2.1)       |
| <b>Pericardial Effusion, <i>n (%)</i></b>                      | <i>Any</i>                 | 1027 (3.9)     | 935 (4.0)      | 71 (3.8)       | 21 (3.4)       |
| <b>Elevated RA Pressure, <i>n (%)</i></b>                      | <i>≥8 mmHg</i>             | 5662 (20.0)    | 722 (15.5)     | 4596 (21.0)    | 344 (19.5)     |
| <b>RA Transverse Dimension (cm),</b>                           |                            | 3.83 (0.78)    | 3.83 (0.80)    | 3.83 (0.77)    | 3.80 (0.75)    |

|                                           |                            |               |               |               |               |
|-------------------------------------------|----------------------------|---------------|---------------|---------------|---------------|
| <i>mean (sd)</i>                          |                            |               |               |               |               |
| <b>RV S' (cm/s), mean (sd)</b>            |                            | 12.68 (3.29)  | 12.60 (3.30)  | 12.85 (3.35)  | 12.93 (3.21)  |
| <b>RV Systolic Dysfunction, n (%)</b>     |                            | 3156 (10.7)   | 2589 (11.3)   | 196 (10.8)    | 371 (7.8)     |
| <b>RV Systolic Pressure, mean (sd)</b>    |                            | 31.73 (13.00) | 32.16 (13.30) | 31.10 (13.12) | 29.79 (11.05) |
| <b>RVIDd (cm), mean (sd)</b>              |                            | 3.15 (0.64)   | 3.16 (0.64)   | 3.13 (0.63)   | 3.11 (0.61)   |
| <b>TAPSE (cm), mean (sd)</b>              |                            | 2.14 (0.54)   | 2.13 (0.54)   | 2.16 (0.53)   | 2.16 (0.52)   |
| <b>TV Peak Gradient (mmHg), mean (sd)</b> |                            | 26.96 (11.42) | 27.28 (11.67) | 26.38 (11.63) | 25.48 (9.76)  |
| <b>TV Regurgitation, n (%)</b>            | <i>None-Trace</i>          | 16191 (51.9)  | 12301 (50.9)  | 1004 (52.1)   | 2886 (56.9)   |
|                                           | <i>Mild</i>                | 10409 (33.4)  | 8199 (33.9)   | 630 (32.7)    | 1580 (31.1)   |
|                                           | <i>Moderate or greater</i> | 4570 (14.7)   | 3666 (15.2)   | 294 (15.2)    | 610 (12.0)    |

Demographics and summary statistics of the internal dataset used for model development and evaluation. Data consists of echocardiogram videos acquired at YNHHS hospitals from 2016-2022. All summary statistics for demographics and labels are computed after excluding missing values and provided at the study level since age and labels are unique to each echocardiography study. AV = aortic valve; ED = end-diastolic; ES = end-systolic; IVSd = intraventricular septum thickness at diastole; LA = left atrium; LV = left ventricle; LAIDs = left atrial internal diameter at systole; LVIDd = left ventricular internal diameter at diastole; LVIDs = left ventricular internal diameter at systole; LVOT = left ventricular outflow tract; LVPWd = left ventricular posterior wall thickness at diastole; MAE = mean absolute error; PG = pressure gradient; RA = right atrium; RV = right ventricle; RVIDd = right ventricular internal diameter at diastole; RV S' = right ventricular systolic excursion velocity; sd = standard deviation; TV = tricuspid valve; YNHHS = Yale-New Haven Health System.

**Extended Data Table 2 | Internal model performance on classification tasks**

|                                     |                            | AUC                  | AP                   |
|-------------------------------------|----------------------------|----------------------|----------------------|
| <b>Pericardial Effusion</b>         | <i>Any</i>                 | 0.914 (0.834, 0.974) | 0.992 (0.980, 0.999) |
| <b>Increased LV Size</b>            | <i>None</i>                | 0.907 (0.897, 0.918) | 0.981 (0.978, 0.984) |
|                                     | <i>Mild</i>                | 0.833 (0.816, 0.850) | 0.298 (0.262, 0.341) |
|                                     | <i>Moderate or greater</i> | 0.945 (0.931, 0.953) | 0.685 (0.604, 0.696) |
| <b>Increased LV Wall Thickness</b>  | <i>Any</i>                 | 0.847 (0.838, 0.856) | 0.890 (0.881, 0.898) |
|                                     | <i>Moderate-Severe</i>     | 0.912 (0.898, 0.926) | 0.992 (0.991, 0.994) |
| <b>LV Systolic Dysfunction</b>      | <i>None-Hyperdynamic</i>   | 0.964 (0.961, 0.972) | 0.994 (0.993, 0.996) |
|                                     | <i>Mild</i>                | 0.922 (0.910, 0.932) | 0.407 (0.365, 0.454) |
|                                     | <i>Moderate or greater</i> | 0.984 (0.978, 0.987) | 0.858 (0.824, 0.877) |
| <b>LV Wall Motion Abnormalities</b> | <i>Any</i>                 | 0.877 (0.858, 0.895) | 0.745 (0.709, 0.781) |
| <b>LV Diastolic Dysfunction</b>     | <i>None</i>                | 0.846 (0.832, 0.853) | 0.909 (0.894, 0.910) |
|                                     | <i>Mild-Indeterminate</i>  | 0.802 (0.790, 0.813) | 0.630 (0.605, 0.655) |
|                                     | <i>Moderate or greater</i> | 0.926 (0.910, 0.930) | 0.532 (0.479, 0.573) |
| <b>Increased RV Size</b>            | <i>None</i>                | 0.841 (0.821, 0.848) | 0.967 (0.962, 0.970) |
|                                     | <i>Mild</i>                | 0.776 (0.759, 0.793) | 0.242 (0.217, 0.274) |
|                                     | <i>Moderate or greater</i> | 0.873 (0.864, 0.899) | 0.336 (0.285, 0.397) |
| <b>RV Systolic Dysfunction</b>      | <i>Any</i>                 | 0.926 (0.915, 0.937) | 0.993 (0.991, 0.994) |
| <b>Increased LA Size</b>            | <i>None</i>                | 0.841 (0.828, 0.847) | 0.921 (0.909, 0.923) |
|                                     | <i>Mild</i>                | 0.753 (0.739, 0.767) | 0.357 (0.328, 0.385) |
|                                     | <i>Moderate or greater</i> | 0.889 (0.879, 0.898) | 0.593 (0.562, 0.627) |
| <b>Increased RA Size</b>            | <i>Any</i>                 | 0.772 (0.752, 0.792) | 0.879 (0.862, 0.895) |
| <b>AV Structure</b>                 | <i>Bicuspid</i>            | 0.806 (0.749, 0.859) | 0.997 (0.995, 0.998) |
| <b>AV Stenosis</b>                  | <i>None</i>                | 0.955 (0.944, 0.959) | 0.995 (0.992, 0.995) |
|                                     | <i>Mild-Moderate</i>       | 0.933 (0.924, 0.943) | 0.540 (0.499, 0.588) |
|                                     | <i>Severe</i>              | 0.986 (0.978, 0.989) | 0.644 (0.484, 0.665) |
| <b>AV Regurgitation</b>             | <i>None-Trace</i>          | 0.863 (0.848, 0.869) | 0.953 (0.947, 0.957) |
|                                     | <i>Mild</i>                | 0.790 (0.777, 0.803) | 0.396 (0.370, 0.426) |
|                                     | <i>Moderate or greater</i> | 0.925 (0.908, 0.933) | 0.527 (0.470, 0.569) |
| <b>Elevated LVOT PG</b>             | $\geq 20$ mmHg             | 0.937 (0.878, 0.990) | 0.492 (0.328, 0.690) |
| <b>MV Stenosis</b>                  | <i>Any</i>                 | 0.963 (0.944, 0.978) | 0.999 (0.998, 0.999) |
| <b>MV Regurgitation</b>             | <i>None-Trace</i>          | 0.854 (0.835, 0.854) | 0.886 (0.871, 0.890) |
|                                     | <i>Mild</i>                | 0.733 (0.721, 0.745) | 0.489 (0.466, 0.513) |
|                                     | <i>Moderate or greater</i> | 0.905 (0.896, 0.915) | 0.604 (0.567, 0.635) |
| <b>TV Regurgitation</b>             | <i>None-Trace</i>          | 0.828 (0.819, 0.838) | 0.854 (0.842, 0.864) |
|                                     | <i>Mild</i>                | 0.723 (0.709, 0.734) | 0.503 (0.480, 0.524) |
|                                     | <i>Moderate or greater</i> | 0.890 (0.887, 0.907) | 0.613 (0.581, 0.647) |
| <b>Elevated RA Pressure</b>         | $\geq 8$ mmHg              | 0.814 (0.801, 0.829) | 0.526 (0.496, 0.560) |

Multi-task classification performance on the internal YNHHS test set. Values in parentheses represent bootstrapped 95% confidence intervals. AP = average precision; AUC = area under the receiver operating characteristic curve; AV = aortic valve; LA = left atrium; LV = left ventricle; LVOT PG = left ventricular outflow tract pressure gradient; RA = right atrium; RV = right ventricle; TV = tricuspid valve; YNHHS = Yale-New Haven Health System.

**Extended Data Table 3 | Internal model performance on regression tasks**

|                                          | <b>MAE</b>              | <b>R<sup>2</sup></b> |
|------------------------------------------|-------------------------|----------------------|
| <b>Ejection Fraction (%)</b>             | 4.440 (4.336, 4.551)    | 0.654 (0.636, 0.672) |
| <b>Global Longitudinal Strain (%)</b>    | 1.893 (1.780, 2.012)    | 0.399 (0.312, 0.473) |
| <b>LV ED Volume (cm<sup>3</sup>)</b>     | 18.969 (18.475, 19.461) | 0.700 (0.687, 0.713) |
| <b>LV ES Volume (cm<sup>3</sup>)</b>     | 10.408 (10.063, 10.761) | 0.761 (0.745, 0.777) |
| <b>LV Stroke Volume (cm<sup>3</sup>)</b> | 11.696 (11.429, 11.981) | 0.569 (0.552, 0.585) |
| <b>IVSd (cm)</b>                         | 0.130 (0.127, 0.133)    | 0.478 (0.437, 0.511) |
| <b>LVPWd (cm)</b>                        | 0.115 (0.113, 0.117)    | 0.449 (0.433, 0.465) |
| <b>LVIDs (cm)</b>                        | 0.338 (0.332, 0.345)    | 0.596 (0.579, 0.611) |
| <b>LVIDd (cm)</b>                        | 0.378 (0.370, 0.385)    | 0.506 (0.492, 0.520) |
| <b>LVOT Diameter (cm)</b>                | 0.135 (0.132, 0.138)    | 0.322 (0.307, 0.337) |
| <b>E e' Ratio</b>                        | 1.966 (1.922, 2.009)    | 0.628 (0.613, 0.644) |
| <b>RV Systolic Pressure (mmHg)</b>       | 5.985 (5.843, 6.144)    | 0.461 (0.438, 0.483) |
| <b>RVIDd (cm)</b>                        | 0.397 (0.387, 0.406)    | 0.300 (0.280, 0.318) |
| <b>TAPSE (cm)</b>                        | 0.336 (0.329, 0.343)    | 0.333 (0.315, 0.350) |
| <b>RV S' (cm/s)</b>                      | 1.911 (1.859, 1.960)    | 0.343 (0.319, 0.365) |
| <b>LAIIDs (cm)</b>                       | 0.398 (0.390, 0.405)    | 0.605 (0.592, 0.616) |
| <b>LA Volume (cm<sup>3</sup>)</b>        | 9.412 (9.218, 9.598)    | 0.593 (0.577, 0.606) |
| <b>RA Transverse Dimension (cm)</b>      | 0.467 (0.457, 0.478)    | 0.368 (0.344, 0.391) |
| <b>AV Peak Velocity (m/s)</b>            | 0.310 (0.303, 0.318)    | 0.593 (0.578, 0.607) |
| <b>TV Peak Gradient (mmHg)</b>           | 5.572 (5.439, 5.720)    | 0.401 (0.378, 0.422) |
| <b>Aortic Root Dimension (cm)</b>        | 0.282 (0.277, 0.287)    | 0.428 (0.416, 0.440) |

Multi-task regression performance on the internal YNHHS test set. Values in parentheses represent bootstrapped 95% confidence intervals. AV = aortic valve; ED = end-diastolic; ES = end-systolic; IVSd = intraventricular septum thickness at diastole; LA = left atrium; LV = left ventricle; LAIDs = left atrial internal diameter at systole; LVIDd = left ventricular internal diameter at diastole; LVIDs = left ventricular internal diameter at systole; LVOT = left ventricular outflow tract; LVPWd = left ventricular posterior wall thickness at diastole; MAE = mean absolute error; RA = right atrium; RV = right ventricle; RVIDd = right ventricular internal diameter at diastole; RV S' = right ventricular systolic excursion velocity; TV = tricuspid valve; YNHHS = Yale-New Haven Health System.

**Extended Data Table 4 | External model performance on EchoNet-LVH**

| <i>Classification Tasks</i>        |                        |                      |                      |
|------------------------------------|------------------------|----------------------|----------------------|
|                                    |                        | <b>AUC</b>           | <b>AP</b>            |
| <b>Increased LV Size</b>           | <i>None</i>            | 0.892 (0.883, 0.894) | 0.964 (0.960, 0.965) |
|                                    | <i>Mild</i>            | 0.845 (0.838, 0.852) | 0.513 (0.495, 0.533) |
|                                    | <i>Moderate-Severe</i> | 0.982 (0.979, 0.985) | 0.744 (0.693, 0.764) |
| <b>Increased LV Wall Thickness</b> | <i>Any</i>             | 0.842 (0.835, 0.848) | 0.939 (0.935, 0.942) |
|                                    | <i>Moderate-Severe</i> | 0.887 (0.879, 0.896) | 0.992 (0.991, 0.992) |
| <i>Regression Tasks</i>            |                        |                      |                      |
|                                    |                        | <b>MAE</b>           | <b>R<sup>2</sup></b> |
| <b>IVSd (cm)</b>                   |                        | 0.134 (0.132, 0.136) | 0.450 (0.437, 0.462) |
| <b>LVPWd (cm)</b>                  |                        | 0.130 (0.128, 0.131) | 0.349 (0.335, 0.364) |
| <b>LVIDs (cm)</b>                  |                        | 0.358 (0.353, 0.363) | 0.704 (0.696, 0.712) |
| <b>LVIDd (cm)</b>                  |                        | 0.381 (0.376, 0.386) | 0.634 (0.627, 0.642) |

Multi-task performance on the external EchoNet-LVH dataset. Values in parentheses represent bootstrapped 95% confidence intervals. AP = average precision; AUC = area under the receiver operator characteristic curve; IVSd = intraventricular septum thickness at diastole; LV = left ventricle; LVIDd = left ventricular internal diameter at diastole; LVIDs = left ventricular internal diameter at systole; LVPWd = left ventricular posterior wall thickness at diastole; MAE = mean absolute error.

**Extended Data Table 5 | External model performance on EchoNet-Dynamic**

| <i>Classification Tasks</i>          |                            |                         |                      |
|--------------------------------------|----------------------------|-------------------------|----------------------|
|                                      |                            | <b>AUC</b>              | <b>AP</b>            |
| <b>LV Systolic Dysfunction</b>       | <i>None-Hyperdynamic</i>   | 0.886 (0.884, 0.897)    | 0.946 (0.942, 0.951) |
|                                      | <i>Mild</i>                | 0.775 (0.766, 0.785)    | 0.347 (0.330, 0.366) |
|                                      | <i>Moderate or greater</i> | 0.941 (0.939, 0.949)    | 0.764 (0.760, 0.793) |
| <i>Regression Tasks</i>              |                            |                         |                      |
|                                      |                            | <b>MAE</b>              | <b>R<sup>2</sup></b> |
| <b>Ejection Fraction (%)</b>         |                            | 5.526 (5.447, 5.620)    | 0.613 (0.599, 0.626) |
| <b>LV ED Volume (cm<sup>3</sup>)</b> |                            | 25.701 (25.256, 26.169) | 0.310 (0.295, 0.327) |
| <b>LV ES Volume (cm<sup>3</sup>)</b> |                            | 14.629 (14.281, 14.980) | 0.493 (0.475, 0.510) |

Multi-task performance on the external EchoNet-Dynamic dataset. Values in parentheses represent bootstrapped 95% confidence intervals. AP = average precision; AUC = area under the receiver operator characteristic curve; ED = end-diastolic; ES = end-systolic; LV = left ventricle; MAE = mean absolute error.

**Extended Data Table 6 | Transfer learning performance on EchoNet-Dynamic**

| <b>Model</b> | <b>Backbone</b>   | <b>Initialization</b> | <b>MAE</b>               | <b>R<sup>2</sup> (%)</b> | <b>Epochs to converge</b> |
|--------------|-------------------|-----------------------|--------------------------|--------------------------|---------------------------|
| 3D           | 3DResNet18        | Kinetics-400          | 5.63 (5.41, 5.87)        | 61.9 (57.8, 65.3)        | 5                         |
| 2+1D         | ConvNeXt-B        | EchoCLIP              | 5.40 (5.17, 5.61)        | 64.8 (61.2, 68.2)        | 17                        |
| 2+1D         | ConvNeXt-T        | Random                | 5.62 (5.37, 5.85)        | 59.8 (56.2, 63.5)        | 15                        |
| 2+1D         | ConvNeXt-T        | ImageNet              | 5.37 (5.13, 5.61)        | 64.3 (60.4, 67.6)        | 9                         |
| 2+1D         | <i>ConvNeXt-T</i> | <i>PanEcho (ours)</i> | <i>4.69 (4.49, 4.86)</i> | <i>73.8 (70.9, 76.5)</i> | <i>2</i>                  |

EF regression results when fine-tuning deep learning models with different architectures and weight initializations. Models were fine-tuned on the official training set and evaluated on the official test set of EchoNet-Dynamic. “Epochs to converge” refers to the number of epochs after which the best validation performance was reached before training was terminated via early stopping. Values in parentheses represent bootstrapped 95% confidence intervals. EF = ejection fraction; MAE = mean absolute error.



**Extended Data Table 7 | Transfer learning performance on EchoNet-Pediatric**

| <b>Model</b> | <b>Backbone</b>   | <b>Initialization</b> | <b>MAE</b>               | <b>R<sup>2</sup> (%)</b> | <b>Epochs to converge</b> |
|--------------|-------------------|-----------------------|--------------------------|--------------------------|---------------------------|
| 3D           | 3DResNet18        | Kinetics-400          | 4.82 (4.71, 4.94)        | 55.7 (52.8, 58.3)        | 13.7 ± 5.6                |
| 2+1D         | ConvNeXt-B        | EchoCLIP              | 5.16 (5.02, 5.30)        | 41.0 (37.4, 44.3)        | 12.7 ± 6.0                |
| 2+1D         | ConvNeXt-T        | Random                | 4.91 (4.78, 5.03)        | 51.1 (48.2, 54.1)        | 9.6 ± 3.1                 |
| 2+1D         | ConvNeXt-T        | ImageNet              | 4.47 (4.36, 4.58)        | 61.2 (58.6, 63.6)        | 10.6 ± 3.4                |
| 2+1D         | <i>ConvNeXt-T</i> | <i>PanEcho (ours)</i> | <i>3.87 (3.79, 3.95)</i> | <i>73.3 (71.1, 75.2)</i> | <i>5.5 ± 1.9</i>          |

Pediatric EF regression results when fine-tuning deep learning models with different architectures and weight initializations. Models were fine-tuned via 10-fold cross-validation given the official splits provided by EchoNet-Pediatric, then evaluated on the union of all held-out predictions. “Epochs to converge” refers to the mean ± standard deviation number of epochs (across the 10 cross-validation runs) after which the best validation performance was reached before training was terminated via early stopping. Values in parentheses represent bootstrapped 95% confidence intervals. EF = ejection fraction; MAE = mean absolute error.

**Extended Data Table 8 | Description of multi-task labels**

| Task Name                    | Task Type                  | Classes                                       |
|------------------------------|----------------------------|-----------------------------------------------|
| Aortic Root Dimension        | Regression                 |                                               |
| AV Peak Velocity             | Regression                 |                                               |
| AV Regurgitation             | Multi-class classification | None-Trace, Mild, Moderate or greater         |
| AV Stenosis                  | Multi-class classification | None, Mild-Moderate, Severe                   |
| AV Structure                 | Binary classification      | Bicuspid                                      |
| E e' Ratio                   | Regression                 |                                               |
| Ejection Fraction            | Regression                 |                                               |
| Global Longitudinal Strain   | Regression                 |                                               |
| Increased LA Size            | Multi-class classification | None, Mild, Moderate or greater               |
| Increased LV Size            | Multi-class classification | None, Mild, Moderate or greater               |
| Increased LV Wall Thickness  | Multi-label classification | Any, Moderate or greater                      |
| Increased RA Size            | Binary classification      | Any                                           |
| Increased RV Size            | Multi-class classification | None, Mild, Moderate or greater               |
| IVSd                         | Regression                 |                                               |
| LA Volume                    | Regression                 |                                               |
| LAIDs                        | Regression                 |                                               |
| LV Diastolic Dysfunction     | Multi-class classification | None, Mild-Indeterminate, Moderate or greater |
| LV ED Volume                 | Regression                 |                                               |
| LV ES Volume                 | Regression                 |                                               |
| LV Stroke Volume             | Regression                 |                                               |
| LV Systolic Dysfunction      | Multi-class classification | None-Hyperdynamic, Mild, Moderate or greater  |
| LV Wall Motion Abnormalities | Binary classification      | Any                                           |
| LVIDd                        | Regression                 |                                               |
| LVIDs                        | Regression                 |                                               |
| LVOT Diameter                | Regression                 |                                               |
| LVOT PG                      | Binary classification      | $\geq 20$ mmHg                                |
| LVPWd                        | Regression                 |                                               |
| MV Regurgitation             | Multi-class classification | None-Trace, Mild, Moderate or greater         |
| MV Stenosis                  | Binary classification      | Any                                           |
| Pericardial Effusion         | Binary classification      | Any                                           |
| RA Pressure                  | Binary classification      | $\geq 8$ mmHg                                 |
| RA Transverse Dimension      | Regression                 |                                               |
| RV S'                        | Regression                 |                                               |
| RV Systolic Dysfunction      | Binary classification      | Any                                           |
| RV Systolic Pressure         | Regression                 |                                               |
| RVIDd                        | Regression                 |                                               |
| TAPSE                        | Regression                 |                                               |
| TV Peak Gradient             | Regression                 |                                               |
| TV Regurgitation             | Multi-class classification | None-Trace, Mild, Moderate or greater         |

Description of task types and subclasses. While multi-class classification involves discriminating mutually exclusive classes, multi-label classification involves discerning potentially overlapping classes. AV = aortic valve; ED = end-diastolic; ES = end-systolic; IVSd = intraventricular septum thickness at diastole; LA = left atrium; LV = left ventricle; LAIDs = left atrial internal diameter at systole; LVIDd = left ventricular internal diameter at diastole; LVIDs = left ventricular internal diameter at systole; LVOT = left ventricular outflow tract; LVPWd = left ventricular posterior wall thickness at diastole; MAE = mean absolute error; PG =

pressure gradient; RA = right atrium; RV = right ventricle; RVIDd = right ventricular internal diameter at diastole; RV S' = right ventricular systolic excursion velocity; TV = tricuspid valve.

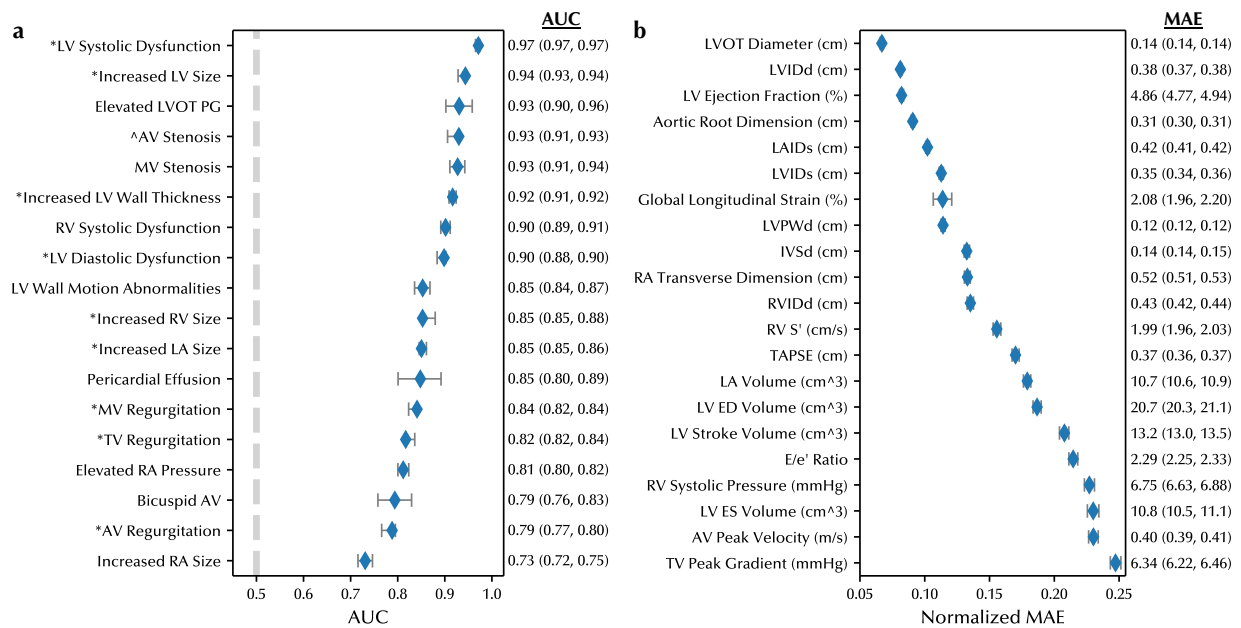

**Extended Data Fig. 1 | PanEcho performance under a simplified imaging protocol.** Multi-task evaluation of *PanEcho* on the internal YNHHS test set leveraging at most one video from each of the following key views per study: PLAX, PSAX at the papillary muscle, A4C, A5C, and A2C. Error bars and values in parentheses represent bootstrapped 95% confidence intervals. **(a)** For classification tasks, AUC values are presented. The grey dashed line represents the performance of random guessing. \* = moderate or greater; ^ = severe. **(b)** For regression tasks, normalized MAE (using the mean of ground truth measurements) is visually presented to account for varying scales and units. Raw MAE is also presented in text beside each task. AUC = area under the receiver operating characteristic curve; AV = aortic valve; A2C = apical 2-chamber; A4C = apical 4-chamber; A5C = apical 5-chamber; ED = end-diastolic; ES = end-systolic; IVSd = intraventricular septum thickness at diastole; LA = left atrium; LV = left ventricle; LAIDs = left atrial internal diameter at systole; LVIDd = left ventricular internal diameter at diastole; LVIDs = left ventricular internal diameter at systole; LVOT = left ventricular outflow tract; LVPWd = left ventricular posterior wall thickness at diastole; MAE = mean absolute error; PG = pressure gradient; PLAX = parasternal long axis; PSAX = parasternal short axis; RA = right atrium; RV = right ventricle; RVIDd = right ventricular internal diameter at diastole; RV S' = right ventricular systolic excursion velocity; TV = tricuspid valve; YNHHS = Yale-New Haven Health System.

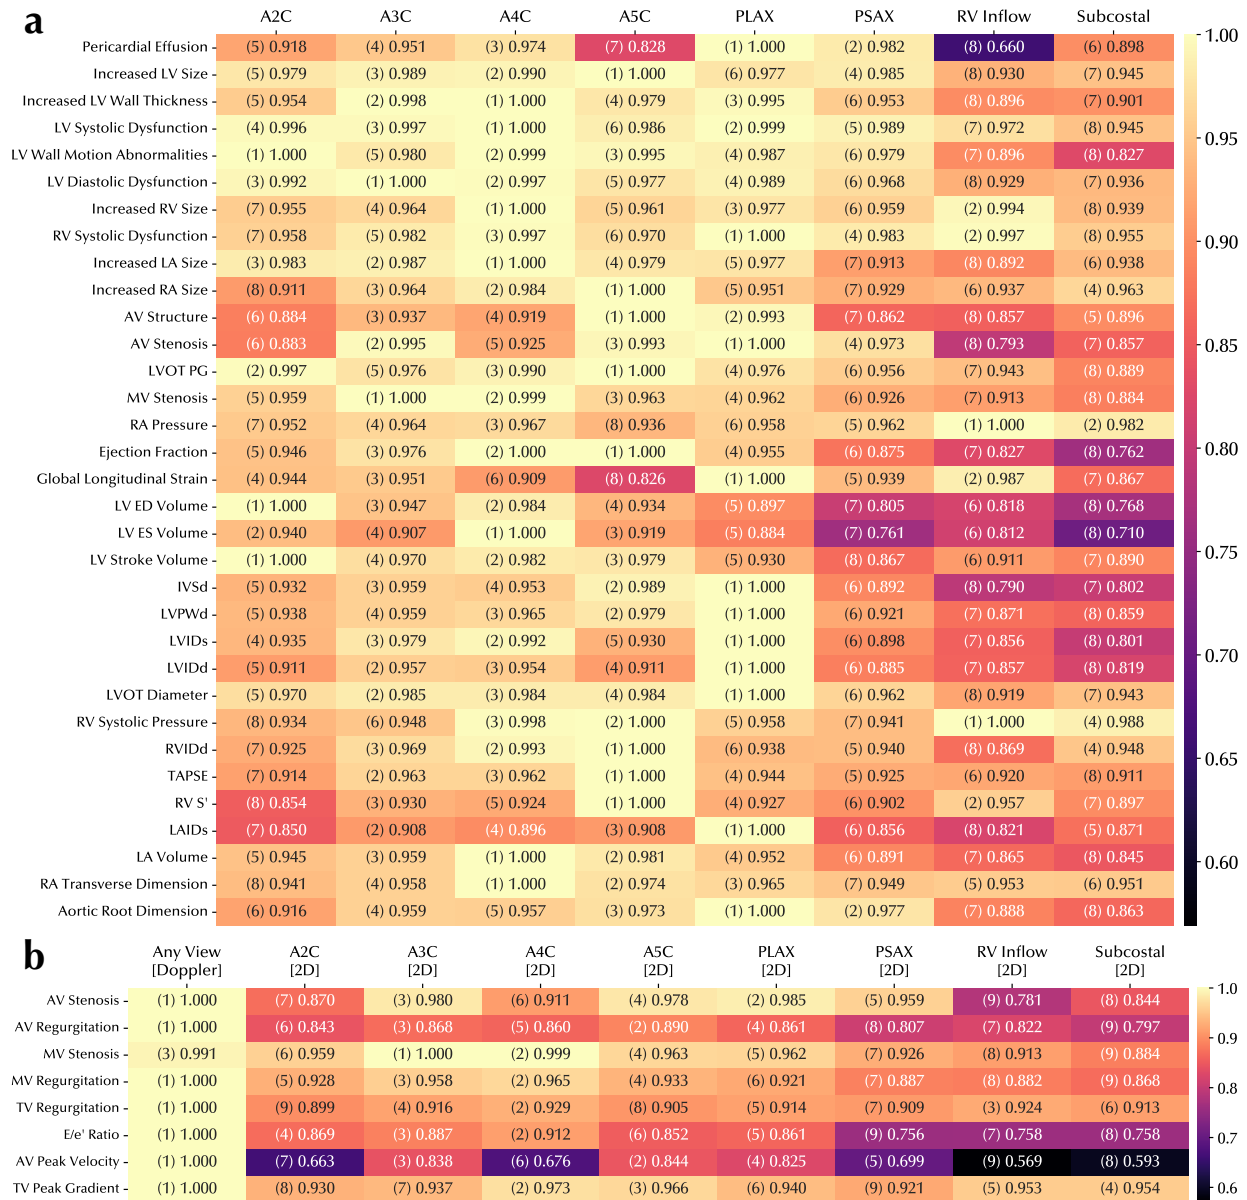

**Extended Data Fig. 2 | Task-specific view relevance.** View relevance scores depicting the relative importance of each echocardiographic view (column) for a given task (row). For each task, a score of 1 indicates the most relevant view, and values in parentheses represent the rank importance of a view. **(a)** View relevance scores for all 39 tasks and all major 2D echocardiographic views. **(b)** View relevance scores for tasks known to be aided by Doppler imaging when including color Doppler videos (with potentially unknown view) as a “view”. AUC = area under the receiver operating characteristic curve; AV = aortic valve; A2C = apical 2-chamber; A3C = apical 3-chamber; A4C = apical 4-chamber; A5C = apical 5-chamber; ED = end-diastolic; ES = end-systolic; IVSd = intraventricular septum thickness at diastole; LA = left atrium; LV = left ventricle; LAIDs = left atrial internal diameter at systole; LVIDd = left ventricular internal diameter at diastole; LVIDs = left ventricular internal diameter at systole; LVOT = left ventricular outflow tract; LVPWd = left ventricular posterior wall thickness at diastole; MAE = mean absolute error; PLAX = parasternal long axis; PSAX = parasternal short axis; PG = pressure gradient; RA = right atrium; RV = right ventricle; RVIDd = right

ventricular internal diameter at diastole; RV S' = right ventricular systolic excursion velocity; TV = tricuspid valve.
